# Supplementary material for: Transcriptomic and Coexpression Network Analyses Revealed Pine Chalcone Synthase Genes Associated with Pine Wood Nematode Infection
Source: MDPI journal article supplement (doi:10.3390/ijms222011195), 2021-10-17
Supplement: s1 [file s1]

# **Transcriptomic and Coexpression Network Analyses Revealed Pine *Chalcone Synthase* Genes Associated with Pine Wood Nematode Infection**

Qiaoli Chen <sup>1,2†</sup>, Ruizhi Zhang <sup>1†</sup>, Danlei Li <sup>1,2</sup>, Feng Wang <sup>1,2\*</sup>

<sup>1</sup> Key Laboratory of Alien Forest Pests Monitoring and Control-Heilongjiang Province, School of Forestry, Northeast Forestry University, Harbin 150040, China

<sup>2</sup> Key Laboratory of Sustainable Forest Ecosystem Management-Ministry of Education, Northeast Forestry University, Harbin 150040, China

\* Correspondence: fengwang@nefu.edu.cn (F.W.)

† These authors contributed equally to this work.

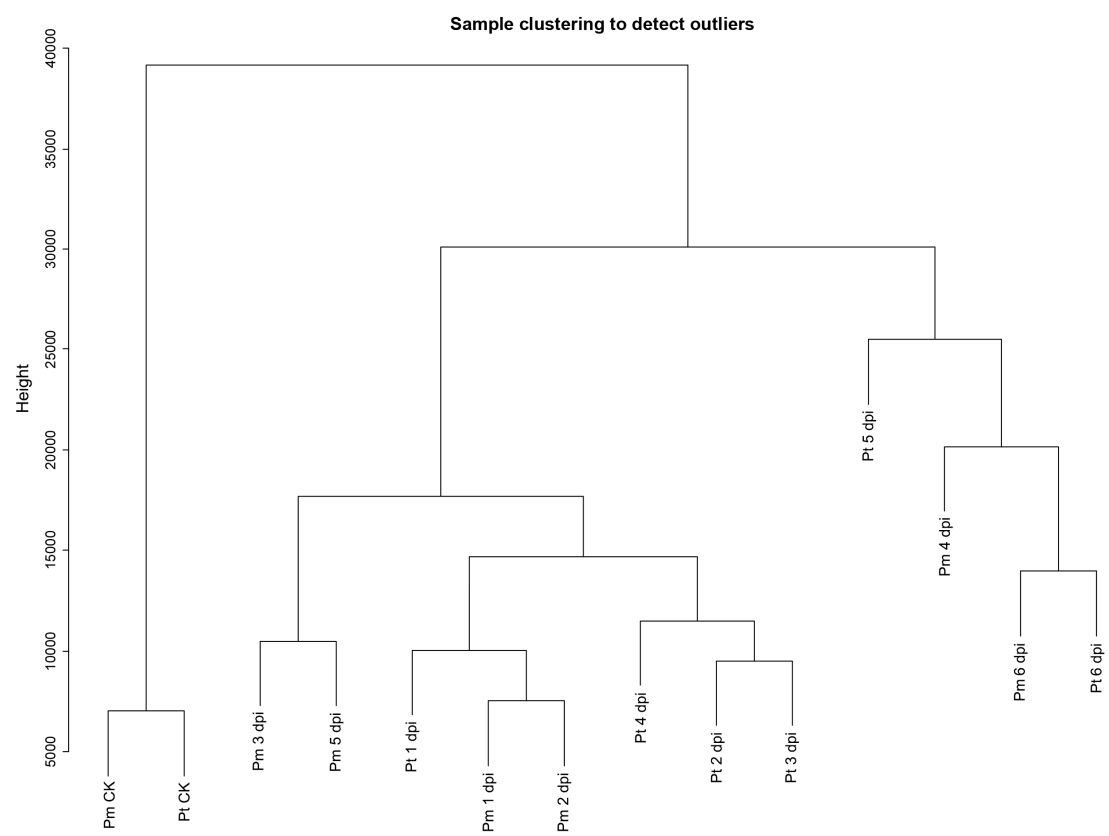

**Figure S1.** Sample clustering to detect outliers.

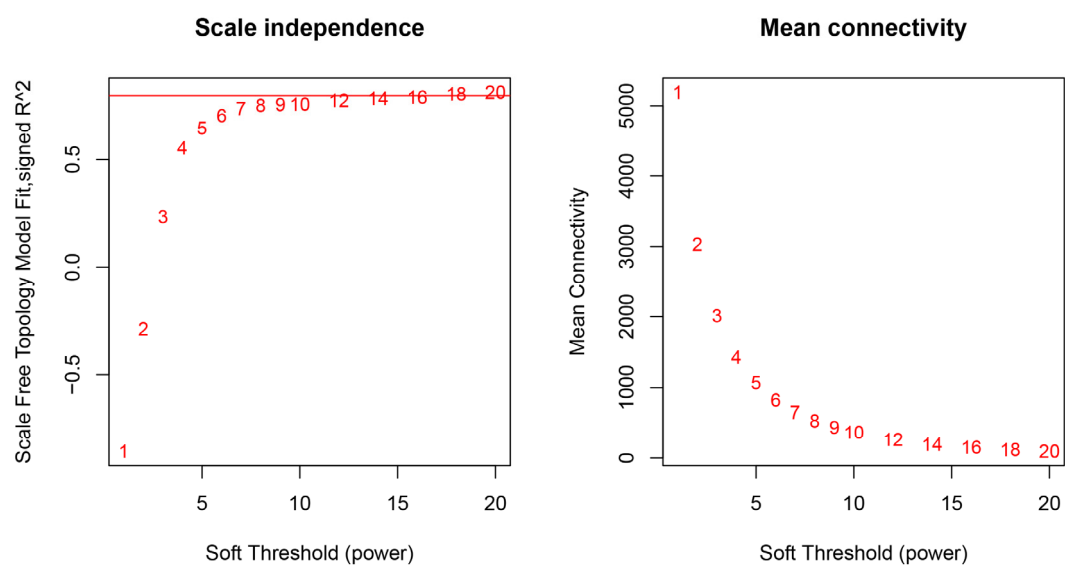

**Figure S2.** Soft power selection.

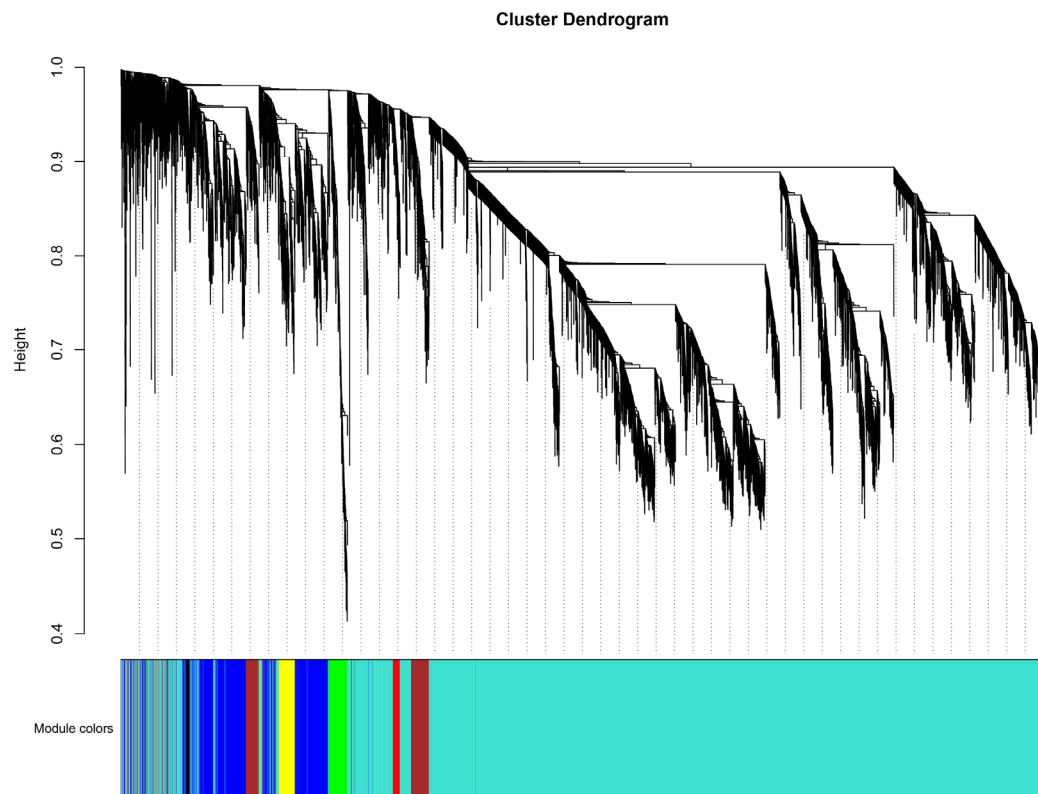

**Figure S3.** Cluster dendrogram.

Table S1. Quality statistics of filtered reads.

| Sample   | Total raw<br>reads (Mb) | Total clean<br>reads (Mb) | Total clean<br>bases (Gb) | Clean reads<br>Q20 (%) | Clean reads<br>Q30 (%) | Clean reads ratio<br>(%) |
|----------|-------------------------|---------------------------|---------------------------|------------------------|------------------------|--------------------------|
| Pt 1 dpi | 34.16                   | 29.44                     | 4.41                      | 98.79                  | 96.29                  | 86.19                    |
| Pt 2 dpi | 34.85                   | 29.79                     | 4.47                      | 98.86                  | 96.33                  | 85.49                    |
| Pt 3 dpi | 33.25                   | 28.55                     | 4.28                      | 98.88                  | 96.24                  | 85.87                    |
| Pt 4 dpi | 32.98                   | 28.16                     | 4.22                      | 98.90                  | 95.89                  | 85.40                    |
| Pt 5 dpi | 33.41                   | 28.50                     | 4.27                      | 98.81                  | 96.22                  | 85.31                    |
| Pt 6 dpi | 32.89                   | 28.23                     | 4.23                      | 98.77                  | 96.49                  | 85.84                    |
| Pt CK    | 32.00                   | 27.15                     | 4.07                      | 98.87                  | 96.31                  | 84.85                    |
| Pm 1dpi  | 35.76                   | 30.19                     | 4.53                      | 98.80                  | 95.99                  | 84.43                    |
| Pm 2 dpi | 34.98                   | 30.04                     | 4.50                      | 98.68                  | 95.89                  | 85.89                    |
| Pm 3 dpi | 35.09                   | 29.95                     | 4.49                      | 98.79                  | 95.77                  | 85.36                    |
| Pm 4 dpi | 35.55                   | 30.28                     | 4.54                      | 98.83                  | 96.02                  | 85.19                    |
| Pm 5 dpi | 34.68                   | 29.86                     | 4.48                      | 98.88                  | 96.21                  | 86.11                    |
| Pm 6 dpi | 35.77                   | 30.97                     | 4.64                      | 98.97                  | 96.19                  | 86.58                    |
| Pm CK    | 35.80                   | 30.22                     | 4.53                      | 98.78                  | 96.16                  | 84.41                    |

Table S2. Number of genes in each module.

| Module    | Gene number |
|-----------|-------------|
| black     | 56          |
| blue      | 1349        |
| brown     | 427         |
| green     | 254         |
| grey      | 114         |
| red       | 108         |
| turquoise | 9275        |
| yellow    | 278         |

Table S3. GO enrichment result for genes in the turquoise module (top 20 terms for each class).

| ID         | Count | Class              | Description                                  |
|------------|-------|--------------------|----------------------------------------------|
| GO:0008150 | 2056  | Biological Process | biological process                           |
| GO:0008152 | 1551  | Biological Process | metabolic process                            |
| GO:0071704 | 1107  | Biological Process | organic substance metabolic process          |
| GO:0009987 | 1093  | Biological Process | cellular process                             |
| GO:0044238 | 882   | Biological Process | primary metabolic process                    |
| GO:0044237 | 871   | Biological Process | cellular metabolic process                   |
| GO:0043170 | 720   | Biological Process | macromolecule metabolic process              |
| GO:0044699 | 649   | Biological Process | single-organism process                      |
| GO:0044763 | 512   | Biological Process | single-organism cellular process             |
| GO:0044260 | 452   | Biological Process | cellular macromolecule metabolic process     |
| GO:0044710 | 437   | Biological Process | single-organism metabolic process            |
| GO:0006807 | 413   | Biological Process | nitrogen compound metabolic process          |
| GO:0019538 | 352   | Biological Process | protein metabolic process                    |
| GO:0044281 | 346   | Biological Process | small molecule metabolic process             |
| GO:0034641 | 334   | Biological Process | cellular nitrogen compound metabolic process |
| GO:0010467 | 326   | Biological Process | gene expression                              |
| GO:1901360 | 319   | Biological Process | organic cyclic compound metabolic process    |
| GO:0006725 | 310   | Biological Process | cellular aromatic compound metabolic process |
| GO:0051179 | 307   | Biological Process | localization                                 |
| GO:0046483 | 304   | Biological Process | heterocycle metabolic process                |
| GO:0005575 | 1473  | Cellular Component | cellular component                           |
| GO:0005623 | 1196  | Cellular Component | cell                                         |
| GO:0044464 | 1196  | Cellular Component | cell part                                    |
| GO:0005622 | 1009  | Cellular Component | intracellular                                |
| GO:0044424 | 993   | Cellular Component | intracellular part                           |
| GO:0043226 | 699   | Cellular Component | organelle                                    |
| GO:0043229 | 693   | Cellular Component | intracellular organelle                      |
| GO:0043227 | 598   | Cellular Component | membrane-bounded organelle                   |
| GO:0043231 | 586   | Cellular Component | intracellular membrane-bounded organelle     |
| GO:0016020 | 363   | Cellular Component | membrane                                     |
| GO:0032991 | 321   | Cellular Component | macromolecular complex                       |
| GO:0005737 | 284   | Cellular Component | cytoplasm                                    |
| GO:0044444 | 281   | Cellular Component | cytoplasmic part                             |
| GO:0044425 | 205   | Cellular Component | membrane part                                |
| GO:0030529 | 170   | Cellular Component | intracellular ribonucleoprotein complex      |
| GO:1990904 | 170   | Cellular Component | ribonucleoprotein complex                    |
| GO:0031224 | 165   | Cellular Component | intrinsic component of membrane              |
| GO:0009536 | 163   | Cellular Component | plastid                                      |
| GO:0044422 | 160   | Cellular Component | organelle part                               |
| GO:0044446 | 150   | Cellular Component | intracellular organelle part                 |
| GO:0003674 | 2655  | Molecular Function | molecular function                           |
| GO:0003824 | 1752  | Molecular Function | catalytic activity                           |

|            |      |                    |                                 |
|------------|------|--------------------|---------------------------------|
| GO:0005488 | 1523 | Molecular Function | binding                         |
| GO:0097159 | 761  | Molecular Function | organic cyclic compound binding |
| GO:1901363 | 761  | Molecular Function | heterocyclic compound binding   |
| GO:0016740 | 542  | Molecular Function | transferase activity            |
| GO:0016787 | 525  | Molecular Function | hydrolase activity              |
| GO:0036094 | 514  | Molecular Function | small molecule binding          |
| GO:0000166 | 501  | Molecular Function | nucleotide binding              |
| GO:1901265 | 501  | Molecular Function | nucleoside phosphate binding    |
| GO:0043167 | 459  | Molecular Function | ion binding                     |
| GO:0043169 | 432  | Molecular Function | cation binding                  |
| GO:0097367 | 381  | Molecular Function | carbohydrate derivative binding |
| GO:0017076 | 380  | Molecular Function | purine nucleotide binding       |
| GO:0032553 | 378  | Molecular Function | ribonucleotide binding          |
| GO:0032555 | 378  | Molecular Function | purine ribonucleotide binding   |
| GO:0046872 | 366  | Molecular Function | metal ion binding               |
| GO:0030554 | 299  | Molecular Function | adenyl nucleotide binding       |
| GO:0032559 | 297  | Molecular Function | adenyl ribonucleotide binding   |
| GO:0003676 | 281  | Molecular Function | nucleic acid binding            |



Table S4. GO enrichment result for genes in the yellow module (top 20 terms for each class).

| ID         | Count | Class              | Description                                  |
|------------|-------|--------------------|----------------------------------------------|
| GO:0008150 | 79    | Biological Process | biological process                           |
| GO:0008152 | 69    | Biological Process | metabolic process                            |
| GO:0009987 | 42    | Biological Process | cellular process                             |
| GO:0044237 | 35    | Biological Process | cellular metabolic process                   |
| GO:0071704 | 34    | Biological Process | organic substance metabolic process          |
| GO:0044238 | 30    | Biological Process | primary metabolic process                    |
| GO:0044699 | 28    | Biological Process | single-organism process                      |
| GO:0044710 | 23    | Biological Process | single-organism metabolic process            |
| GO:0044763 | 22    | Biological Process | single-organism cellular process             |
| GO:0044281 | 17    | Biological Process | small molecule metabolic process             |
| GO:0006807 | 13    | Biological Process | nitrogen compound metabolic process          |
| GO:0043170 | 12    | Biological Process | macromolecule metabolic process              |
| GO:0006082 | 10    | Biological Process | organic acid metabolic process               |
| GO:0006725 | 10    | Biological Process | cellular aromatic compound metabolic process |
| GO:0009058 | 10    | Biological Process | biosynthetic process                         |
| GO:0019538 | 10    | Biological Process | protein metabolic process                    |
| GO:0019752 | 10    | Biological Process | carboxylic acid metabolic process            |
| GO:0043436 | 10    | Biological Process | oxoacid metabolic process                    |
| GO:0044260 | 10    | Biological Process | cellular macromolecule metabolic process     |
| GO:1901360 | 9     | Biological Process | organic cyclic compound metabolic process    |
| GO:0005575 | 35    | Cellular Component | cellular component                           |
| GO:0005623 | 30    | Cellular Component | cell                                         |
| GO:0044464 | 30    | Cellular Component | cell part                                    |
| GO:0005622 | 22    | Cellular Component | intracellular                                |
| GO:0044424 | 22    | Cellular Component | intracellular part                           |
| GO:0043226 | 15    | Cellular Component | organelle                                    |
| GO:0043229 | 15    | Cellular Component | intracellular organelle                      |
| GO:0043227 | 13    | Cellular Component | membrane-bounded organelle                   |
| GO:0043231 | 13    | Cellular Component | intracellular membrane-bounded organelle     |
| GO:0005737 | 8     | Cellular Component | cytoplasm                                    |
| GO:0044444 | 8     | Cellular Component | cytoplasmic part                             |
| GO:0016020 | 6     | Cellular Component | membrane                                     |
| GO:0032991 | 5     | Cellular Component | macromolecular complex                       |
| GO:0043234 | 4     | Cellular Component | protein complex                              |
| GO:0009536 | 3     | Cellular Component | plastid                                      |
| GO:0031410 | 3     | Cellular Component | cytoplasmic vesicle                          |
| GO:0031982 | 3     | Cellular Component | vesicle                                      |
| GO:0044425 | 3     | Cellular Component | membrane part                                |
| GO:0031224 | 2     | Cellular Component | intrinsic component of membrane              |
| GO:0042579 | 2     | Cellular Component | microbody                                    |
| GO:0003674 | 109   | Molecular Function | molecular function                           |
| GO:0003824 | 89    | Molecular Function | catalytic activity                           |

|            |    |                    |                                 |
|------------|----|--------------------|---------------------------------|
| GO:0005488 | 55 | Molecular Function | binding                         |
| GO:0016740 | 30 | Molecular Function | transferase activity            |
| GO:0016491 | 21 | Molecular Function | oxidoreductase activity         |
| GO:0043167 | 20 | Molecular Function | ion binding                     |
| GO:0097159 | 20 | Molecular Function | organic cyclic compound binding |
| GO:1901363 | 20 | Molecular Function | heterocyclic compound binding   |
| GO:0043169 | 19 | Molecular Function | cation binding                  |
| GO:0046872 | 18 | Molecular Function | metal ion binding               |
| GO:0036094 | 17 | Molecular Function | small molecule binding          |
| GO:0000166 | 16 | Molecular Function | nucleotide binding              |
| GO:1901265 | 16 | Molecular Function | nucleoside phosphate binding    |
| GO:0016787 | 14 | Molecular Function | hydrolase activity              |
| GO:0017076 | 12 | Molecular Function | purine nucleotide binding       |
| GO:0032553 | 12 | Molecular Function | ribonucleotide binding          |
| GO:0032555 | 12 | Molecular Function | purine ribonucleotide binding   |
| GO:0097367 | 12 | Molecular Function | carbohydrate derivative binding |
| GO:0046914 | 11 | Molecular Function | transition metal ion binding    |
| GO:0030554 | 10 | Molecular Function | adenyl nucleotide binding       |

Table S5. KEGG enrichment result for genes in the turquoise module (top 20 pathways).

| KEGG A class                               | KEGG B class                                   | Pathway                                     | Count<br>(2731 in total) | Pathway ID |
|--------------------------------------------|------------------------------------------------|---------------------------------------------|--------------------------|------------|
| Metabolism                                 | Global and overview maps                       | Metabolic pathways                          | 1184                     | ko01100    |
| Metabolism                                 | Global and overview maps                       | Biosynthesis of secondary metabolites       | 691                      | ko01110    |
| Genetic Information<br>Processing          | Translation                                    | Ribosome                                    | 162                      | ko03010    |
| Genetic Information<br>Processing          | Transcription                                  | Spliceosome                                 | 144                      | ko03040    |
| Environmental<br>Information<br>Processing | Signal transduction                            | Plant hormone signal transduction           | 135                      | ko04075    |
| Genetic Information<br>Processing          | Folding, sorting and degradation               | Protein processing in endoplasmic reticulum | 127                      | ko04141    |
| Metabolism                                 | Global and overview maps                       | Carbon metabolism                           | 119                      | ko01200    |
| Organismal Systems                         | Environmental adaptation                       | Plant-pathogen interaction                  | 114                      | ko04626    |
| Genetic Information<br>Processing          | Translation                                    | RNA transport                               | 111                      | ko03013    |
| Environmental<br>Information<br>Processing | Signal transduction                            | MAPK signaling pathway - plant              | 106                      | ko04016    |
| Metabolism                                 | Carbohydrate metabolism                        | Starch and sucrose metabolism               | 93                       | ko00500    |
| Metabolism                                 | Biosynthesis of other secondary<br>metabolites | Phenylpropanoid biosynthesis                | 93                       | ko00940    |
| Metabolism                                 | Global and overview maps                       | Biosynthesis of amino acids                 | 92                       | ko01230    |
| Cellular Processes                         | Transport and catabolism                       | Endocytosis                                 | 90                       | ko04144    |
| Genetic Information<br>Processing          | Translation                                    | mRNA surveillance pathway                   | 79                       | ko03015    |
| Genetic Information<br>Processing          | Folding, sorting and degradation               | Ubiquitin mediated proteolysis              | 66                       | ko04120    |
| Metabolism                                 | Biosynthesis of other secondary<br>metabolites | Flavonoid biosynthesis                      | 65                       | ko00941    |
| Metabolism                                 | Carbohydrate metabolism                        | Amino sugar and nucleotide sugar metabolism | 64                       | ko00520    |
| Genetic Information<br>Processing          | Folding, sorting and degradation               | RNA degradation                             | 63                       | ko03018    |
| Genetic Information<br>Processing          | Translation                                    | Ribosome biogenesis in eukaryotes           | 60                       | ko03008    |

Table S6. KEGG enrichment result for genes in the yellow module (top 20 pathways).

| KEGG A class                         | KEGG B class                                | Pathway                                             | Count<br>(120 in total) | Pathway ID |
|--------------------------------------|---------------------------------------------|-----------------------------------------------------|-------------------------|------------|
| Metabolism                           | Global and overview maps                    | Metabolic pathways                                  | 78                      | ko01100    |
| Metabolism                           | Global and overview maps                    | Biosynthesis of secondary metabolites               | 68                      | ko01110    |
| Metabolism                           | Biosynthesis of other secondary metabolites | Flavonoid biosynthesis                              | 30                      | ko00941    |
| Metabolism                           | Global and overview maps                    | Biosynthesis of amino acids                         | 12                      | ko01230    |
| Metabolism                           | Biosynthesis of other secondary metabolites | Phenylpropanoid biosynthesis                        | 8                       | ko00940    |
| Metabolism                           | Global and overview maps                    | Carbon metabolism                                   | 8                       | ko01200    |
| Environmental Information Processing | Signal transduction                         | Plant hormone signal transduction                   | 8                       | ko04075    |
| Cellular Processes                   | Transport and catabolism                    | Endocytosis                                         | 6                       | ko04144    |
| Metabolism                           | Carbohydrate metabolism                     | Glycolysis / Gluconeogenesis                        | 5                       | ko00010    |
| Metabolism                           | Biosynthesis of other secondary metabolites | Flavone and flavonol biosynthesis                   | 5                       | ko00944    |
| Environmental Information Processing | Membrane transport                          | ABC transporters                                    | 5                       | ko02010    |
| Environmental Information Processing | Signal transduction                         | MAPK signaling pathway - plant                      | 5                       | ko04016    |
| Organismal Systems                   | Environmental adaptation                    | Circadian rhythm - plant                            | 5                       | ko04712    |
| Metabolism                           | Amino acid metabolism                       | Alanine, aspartate and glutamate metabolism         | 4                       | ko00250    |
| Genetic Information Processing       | Transcription                               | Spliceosome                                         | 4                       | ko03040    |
| Metabolism                           | Carbohydrate metabolism                     | Fructose and mannose metabolism                     | 3                       | ko00051    |
| Metabolism                           | Lipid metabolism                            | Fatty acid degradation                              | 3                       | ko00071    |
| Metabolism                           | Lipid metabolism                            | Cutin, suberine and wax biosynthesis                | 3                       | ko00073    |
| Metabolism                           | Amino acid metabolism                       | Cysteine and methionine metabolism                  | 3                       | ko00270    |
| Metabolism                           | Amino acid metabolism                       | Phenylalanine, tyrosine and tryptophan biosynthesis | 3                       | ko00400    |

Table S7. Genes with the top 30 highest IC values in the turquoise module.

| No. | Gene annotation                                                                                      | IC      | Homologous<br>protein GenBank<br>ID | Protein name                                                                                                       | Blast nr<br><i>p</i> value |
|-----|------------------------------------------------------------------------------------------------------|---------|-------------------------------------|--------------------------------------------------------------------------------------------------------------------|----------------------------|
| 1   | outer membrane<br>family protein                                                                     | 1734.57 | XP_008803105.1                      | PREDICTED: protein TOC75-3,<br>chloroplastic-like [ <i>Phoenix dactylifera</i> ]                                   | $6.78 \times 10^{-159}$    |
| 2   | Dof11                                                                                                | 1715.35 | CAP04930.1                          | dof transcription factor [ <i>Pinus pinaster</i> ]                                                                 | $8.43 \times 10^{-128}$    |
| 3   | pentatricopeptide<br>repeat-containing<br>protein chloroplastic                                      | 1715.25 | XP_010275281.1                      | PREDICTED: pentatricopeptide repeat-<br>containing protein At5g46580, chloroplastic<br>[ <i>Nelumbo nucifera</i> ] | 0                          |
| 4   | KH domain-<br>containing protein                                                                     | 1700.30 | ABK24418.1                          | unknown [ <i>Picea sitchensis</i> ]                                                                                | $2.07 \times 10^{-51}$     |
| 5   | Lysyl-tRNA<br>synthetase                                                                             | 1699.37 | XP_010911688.1                      | PREDICTED: lysine--tRNA ligase-like<br>isoform X2 [ <i>Elaeis guineensis</i> ]                                     | 0                          |
| 6   | transport inhibitor<br>response 1-like<br>protein                                                    | 1690.19 | KHG29069.1                          | hypothetical protein F383_04554 [ <i>Gossypium<br/>arboreum</i> ]                                                  | 0                          |
| 7   | heterodimeric<br>geranylgeranyl<br>pyrophosphate<br>synthase small<br>subunit,<br>chloroplastic-like | 1681.73 | ACN40123.1                          | unknown [ <i>Picea sitchensis</i> ]                                                                                | $1.36 \times 10^{-173}$    |
| 8   | uninformative                                                                                        | 1680.43 | AEW09324.1                          | hypothetical protein UMN_4541_01, partial<br>[ <i>Pinus radiata</i> ]                                              | $6.74 \times 10^{-71}$     |
| 9   | DCD domain protein                                                                                   | 1679.25 | ABK22365.1                          | unknown [ <i>Picea sitchensis</i> ]                                                                                | $5.34 \times 10^{-127}$    |
| 10  | ruBisCO large<br>subunit-binding<br>protein subunit beta,<br>chloroplastic                           | 1677.41 | ABK24483.1                          | unknown [ <i>Picea sitchensis</i> ]                                                                                | 0                          |
| 11  | DNA-directed RNA<br>polymerase I subunit<br>RPA2-like isoform<br>X1                                  | 1676.70 | XP_010659083.1                      | PREDICTED: DNA-directed RNA<br>polymerase I subunit RPA2 isoform X2 [ <i>Vitis<br/>vinifera</i> ]                  | 0                          |
| 12  | probable E3<br>ubiquitin-protein<br>ligase ARI11                                                     | 1671.09 | ADE76274.1                          | unknown [ <i>Picea sitchensis</i> ]                                                                                | 0                          |
| 13  | uninformative                                                                                        | 1665.32 | ABR18130.1                          | unknown [ <i>Picea sitchensis</i> ]                                                                                | $1.02 \times 10^{-110}$    |
| 14  | not annotated                                                                                        | 1665.19 | ADE76372.1                          | unknown [ <i>Picea sitchensis</i> ]                                                                                | 0                          |
| 15  | ruBisCO large<br>subunit-binding                                                                     | 1661.12 | ABR18037.1                          | unknown [ <i>Picea sitchensis</i> ]                                                                                | $1.01 \times 10^{-114}$    |

|    |                                                                                   |         |                |                                                                                                            |                         |
|----|-----------------------------------------------------------------------------------|---------|----------------|------------------------------------------------------------------------------------------------------------|-------------------------|
|    | protein subunit<br>alpha, chloroplastic-<br>like                                  |         |                |                                                                                                            |                         |
| 16 | scarecrow-like<br>protein 6-like                                                  | 1659.92 | AJP06299.1     | HAM1 [ <i>Pinus tabuliformis</i> ]                                                                         | 0                       |
| 17 | not annotated                                                                     | 1653.47 | XP_010270433.1 | PREDICTED: ATP-dependent zinc<br>metalloprotease FtsH [ <i>Nelumbo nucifera</i> ]                          | 0                       |
| 18 | not annotated                                                                     | 1651.52 | ACN40698.1     | unknown [ <i>Picea sitchensis</i> ]                                                                        | $1.11 \times 10^{-75}$  |
| 19 | long chain acyl-CoA<br>synthetase 9,<br>chloroplastic                             | 1650.71 | XP_010912477.1 | PREDICTED: long chain acyl-CoA<br>synthetase 9, chloroplastic-like [ <i>Elaeis<br/>guineensis</i> ]        | 0                       |
| 20 | extensin-like protein                                                             | 1647.48 | ADM76665.1     | extensin-like protein [ <i>Picea sitchensis</i> ]                                                          | $8.90 \times 10^{-60}$  |
| 21 | auxin response factor<br>17-like                                                  | 1637.60 | CBA12003.1     | putative auxin response factor 6/8 [ <i>Ginkgo<br/>biloba</i> ]                                            | $7.44 \times 10^{-59}$  |
| 22 | nucleolin                                                                         | 1632.70 | XP_006838503.1 | PREDICTED: nucleolin [ <i>Amborella<br/>trichopoda</i> ]                                                   | $6.96 \times 10^{-128}$ |
| 23 | ubiquitin interaction<br>motif-containing<br>protein                              | 1629.22 | XP_006383620.1 | hypothetical protein POPTR_0005s21350g<br>[ <i>Populus trichocarpa</i> ]                                   | 0                       |
| 24 | RNA binding protein                                                               | 1626.72 | ADE76786.1     | unknown [ <i>Picea sitchensis</i> ]                                                                        | $5.02 \times 10^{-45}$  |
| 25 | Patellin-6                                                                        | 1623.89 | XP_006828153.1 | PREDICTED: patellin-6 [ <i>Amborella<br/>trichopoda</i> ]                                                  | $9.14 \times 10^{-41}$  |
| 26 | catalase 2                                                                        | 1618.60 | ABK24449.1     | unknown [ <i>Picea sitchensis</i> ]                                                                        | 0                       |
| 27 | N-alpha-<br>acetyltransferase 15,<br>NatA auxiliary<br>subunit-like isoform<br>X1 | 1617.71 | XP_008792977.1 | PREDICTED: N-alpha-acetyltransferase 16,<br>NatA auxiliary subunit-like [ <i>Phoenix<br/>dactylifera</i> ] | 0                       |
| 28 | not annotated                                                                     | 1614.17 | ABK24027.1     | unknown [ <i>Picea sitchensis</i> ]                                                                        | $1.14 \times 10^{-155}$ |
| 29 | homeobox<br>transcription factor<br>Hox7                                          | 1613.32 | XP_008795938.1 | PREDICTED: uncharacterized protein<br>LOC103711537 [ <i>Phoenix dactylifera</i> ]                          | $4.42 \times 10^{-75}$  |
| 30 | glycine-rich RNA-<br>binding protein 3                                            | 1613.31 | XP_009787255.1 | PREDICTED: glycine-rich RNA-binding<br>protein 3, mitochondrial-like [ <i>Nicotiana<br/>sylvestris</i> ]   | $7.19 \times 10^{-24}$  |

Table S8. Genes with the top 30 highest IC values in the yellow module.

| No. | Gene annotation                                                 | IC    | Homologous<br>protein GenBank<br>ID | Protein name                                                                                 | Blast nr<br><i>p</i> value |
|-----|-----------------------------------------------------------------|-------|-------------------------------------|----------------------------------------------------------------------------------------------|----------------------------|
| 1   | (+)-pulegone<br>reductase-like,<br>partial                      | 56.68 | ABR17262.1                          | unknown [ <i>Picea sitchensis</i> ]                                                          | $8.48 \times 10^{-113}$    |
| 2   | chalcone-flavonone<br>isomerase 2                               | 56.14 | ADE77594.1                          | unknown [ <i>Picea sitchensis</i> ]                                                          | 0                          |
| 3   | chalcone synthase 2                                             | 55.53 | AEN84256.1                          | chalcone synthase, partial [ <i>Picea sitchensis</i> ]                                       | 0                          |
| 4   | digalactosyldiacylgly<br>cerol synthase 1,<br>chloroplastic     | 53.75 | XP_002264659.1                      | PREDICTED: digalactosyldiacylglycerol<br>synthase 1, chloroplastic [ <i>Vitis vinifera</i> ] | 0                          |
| 5   | chalcone synthase 2                                             | 52.19 | CAA05214.1                          | chalcone synthase-like protein [ <i>Pinus<br/>strobus</i> ]                                  | 0                          |
| 6   | NADPH<br>oxidoreductase                                         | 51.84 | CAI56321.1                          | TPA: leucoanthocyanidin reductase [ <i>Pinus<br/>taeda</i> ]                                 | 0                          |
| 7   | chalcone synthase                                               | 51.79 | AEN84256.1                          | chalcone synthase, partial [ <i>Picea sitchensis</i> ]                                       | $5.24 \times 10^{-129}$    |
| 8   | receptor-like protein<br>kinase HSL1-like<br>1-                 | 51.50 | XP_012092411.1                      | PREDICTED: receptor-like protein kinase<br>HSL1 [ <i>Jatropha curcas</i> ]                   | 0                          |
| 9   | aminocyclopropane-<br>1-carboxylate<br>synthase                 | 51.49 | ABM60748.1                          | ACC synthase [ <i>Picea engelmannii</i> × <i>Picea<br/>glauca</i> ]                          | 0                          |
| 10  | pleiotropic drug<br>resistance protein 1-<br>like               | 51.28 | XP_010249930.1                      | PREDICTED: pleiotropic drug resistance<br>protein 1-like [ <i>Nelumbo nucifera</i> ]         | $2.45 \times 10^{-134}$    |
| 11  | chorismate mutase                                               | 51.10 | XP_006857227.2                      | PREDICTED: chorismate mutase 1,<br>chloroplastic [ <i>Amborella trichopoda</i> ]             | $2.02 \times 10^{-85}$     |
| 12  | Os09g0332600                                                    | 50.91 | KVI05977.1                          | hypothetical protein Cerd_015657 [ <i>Cynara<br/>cardunculus</i> var. <i>scolymus</i> ]      | 0                          |
| 13  | cinnamoyl-CoA<br>reductase, putative<br>leucoanthocyanidin      | 50.89 | AFC38436.1                          | cinnamoyl-CoA reductase [ <i>Pinus radiata</i> ]                                             | $4.04 \times 10^{-161}$    |
| 14  | dioxygenase family<br>protein                                   | 49.38 | AHW42460.1                          | GA2ox10 [ <i>Pinus tabuliformis</i> ]                                                        | $3.20 \times 10^{-177}$    |
| 15  | chalcone synthase                                               | 48.20 | AGU43679.1                          | pinocembrin chalcone synthase [ <i>Pinus<br/>massoniana</i> ]                                | 0                          |
| 16  | LOW QUALITY<br>PROTEIN:<br>leucoanthocyanidin<br>reductase-like | 47.75 | AHB89627.1                          | leucoanthocyanidin reductase 1 [ <i>Picea abies</i> ]                                        | $2.07 \times 10^{-180}$    |

|    |                                                                                                                                           |       |                |                                                                                       |                         |
|----|-------------------------------------------------------------------------------------------------------------------------------------------|-------|----------------|---------------------------------------------------------------------------------------|-------------------------|
| 17 | phospholipid-<br>transporting ATPase<br>1                                                                                                 | 47.63 | XP_002271241.2 | PREDICTED: phospholipid-transporting<br>ATPase 1 [ <i>Vitis vinifera</i> ]            | 0                       |
| 18 | AMP dependent CoA<br>ligase, putative                                                                                                     | 47.62 | AGX45528.1     | 4-coumarate:CoA ligase [ <i>Pinus taeda</i> ]                                         | 0                       |
| 19 | chalcone synthase 1-<br>like                                                                                                              | 47.59 | ABK24577.1     | unknown [ <i>Picea sitchensis</i> ]                                                   | 0                       |
| 20 | dihydrolipoyllysine-<br>residue<br>succinyltransferase<br>component of 2-<br>oxoglutarate<br>dehydrogenase<br>complex 1,<br>mitochondrial | 46.88 | ADE77401.1     | unknown [ <i>Picea sitchensis</i> ]                                                   | 0                       |
| 21 | oxalate-CoA ligase-<br>like                                                                                                               | 46.50 | ABR16382.1     | unknown [ <i>Picea sitchensis</i> ]                                                   | 0                       |
| 22 | kinase                                                                                                                                    | 46.33 | XP_006856200.1 | PREDICTED: wall-associated receptor<br>kinase-like 14 [ <i>Amborella trichopoda</i> ] | $4.05 \times 10^{-163}$ |
| 23 | not annotated                                                                                                                             | 46.23 | ACN40312.1     | unknown [ <i>Picea sitchensis</i> ]                                                   | 0                       |
| 24 | 3-ketoacyl-CoA<br>thiolase B                                                                                                              | 45.45 | EMS60447.1     | 3-ketoacyl-CoA thiolase 2, peroxisomal<br>[ <i>Triticum urartu</i> ]                  | $1.67 \times 10^{-93}$  |
| 25 | ATP-binding cassette<br>transporter                                                                                                       | 45.27 | XP_010273226.1 | PREDICTED: pleiotropic drug resistance<br>protein 1-like [ <i>Nelumbo nucifera</i> ]  | $3.94 \times 10^{-118}$ |
| 26 | uninformative                                                                                                                             | 45.26 | ABK27055.1     | unknown [ <i>Picea sitchensis</i> ]                                                   | $1.26 \times 10^{-29}$  |
| 27 | flavonoid 3'-<br>monooxygenase                                                                                                            | 45.11 | ABR16821.1     | unknown [ <i>Picea sitchensis</i> ]                                                   | $9.19 \times 10^{-146}$ |
| 28 | probable voltage-<br>gated potassium<br>channel subunit beta-<br>like                                                                     | 45.04 | ABK21055.1     | unknown [ <i>Picea sitchensis</i> ]                                                   | 0                       |
| 29 | trans-cinnamate 4-<br>monooxygenase-like                                                                                                  | 45.03 | AAD23378.1     | trans-cinnamate 4-hydroxylase [ <i>Pinus taeda</i> ]                                  | 0                       |
| 30 | leucoanthocyanidin<br>dioxygenase family<br>protein                                                                                       | 44.96 | AHW42460.1     | GA2ox10 [ <i>Pinus tabulaeformis</i> ]                                                | $2.34 \times 10^{-166}$ |



Table S9. KEGG enrichment result for genes with the top 30 highest IC values in the turquoise module.

| KEGG A class        | KEGG B class                     | Pathway                                 | Count<br>(10 in total) | Pathway ID |
|---------------------|----------------------------------|-----------------------------------------|------------------------|------------|
| Environmental       |                                  |                                         |                        |            |
| Information         | Signal transduction              | Plant hormone signal transduction       | 3                      | ko04075    |
| Processing          |                                  |                                         |                        |            |
| Metabolism          | Global and overview maps         | Metabolic pathways                      | 2                      | ko01100    |
| Genetic Information | Folding, sorting and degradation | RNA degradation                         | 2                      | ko03018    |
| Processing          |                                  |                                         |                        |            |
| Cellular Processes  | Transport and catabolism         | Peroxisome                              | 2                      | ko04146    |
| Metabolism          | Lipid metabolism                 | Fatty acid biosynthesis                 | 1                      | ko00061    |
| Metabolism          | Lipid metabolism                 | Fatty acid degradation                  | 1                      | ko00071    |
| Metabolism          | Amino acid metabolism            | Tryptophan metabolism                   | 1                      | ko00380    |
| Metabolism          | Carbohydrate metabolism          | Glyoxylate and dicarboxylate metabolism | 1                      | ko00630    |
| Genetic Information | Translation                      | Aminoacyl-tRNA biosynthesis             | 1                      | ko00970    |
| Processing          |                                  |                                         |                        |            |
| Metabolism          | Global and overview maps         | Biosynthesis of secondary metabolites   | 1                      | ko01110    |
| Metabolism          | Global and overview maps         | Carbon metabolism                       | 1                      | ko01200    |
| Metabolism          | Global and overview maps         | Fatty acid metabolism                   | 1                      | ko01212    |
| Genetic Information | Transcription                    | Spliceosome                             | 1                      | ko03040    |
| Processing          |                                  |                                         |                        |            |
| Environmental       |                                  |                                         |                        |            |
| Information         | Signal transduction              | MAPK signaling pathway - plant          | 1                      | ko04016    |
| Processing          |                                  |                                         |                        |            |
| Organismal Systems  | Environmental adaptation         | Circadian rhythm - plant                | 1                      | ko04712    |

Table S10. Genes with the top 30 highest negative value of GS values for nematode population in the turquoise module.

| No. | Gene annotation                                                            | GS      | GS<br><i>p</i> value      | Homologous<br>protein GenBank<br>ID | Blast nr<br><i>p</i> value | Protein name                                                                                                                 |
|-----|----------------------------------------------------------------------------|---------|---------------------------|-------------------------------------|----------------------------|------------------------------------------------------------------------------------------------------------------------------|
| 1   | starch synthase 1,<br>chloroplastic/amylopl<br>lastic                      | -0.8941 | $3.01638 \times 10^{-06}$ | XP_006852610.1                      | $2.19 \times 10^{-133}$    | PREDICTED: soluble starch synthase 1,<br>chloroplastic/amyloplastic [ <i>Amborella trichopoda</i> ]                          |
| 2   | serine/threonine-<br>protein phosphatase<br>4 regulatory subunit<br>3-like | -0.8851 | $5.19811 \times 10^{-06}$ | XP_008808656.1                      | $2.26 \times 10^{-68}$     | PREDICTED: serine/threonine-protein<br>phosphatase 4 regulatory subunit 3B-like isoform<br>X1 [ <i>Phoenix dactylifera</i> ] |
| 3   | nuclear pore<br>complex protein<br>NUP88                                   | -0.8724 | $1.04655 \times 10^{-05}$ | XP_011623988.1                      | 0                          | PREDICTED: nuclear pore complex protein<br>NUP88 [ <i>Amborella trichopoda</i> ]                                             |
| 4   | AMP deaminase,<br>putative<br>homeobox-leucine                             | -0.8647 | $1.54239 \times 10^{-05}$ | XP_015582669.1                      | $7.28 \times 10^{-88}$     | PREDICTED: AMP deaminase [ <i>Ricinus<br/>communis</i> ]                                                                     |
| 5   | zipper protein<br>ATHB-13                                                  | -0.8634 | $1.64552 \times 10^{-05}$ | ABK24498.1                          | $3.39 \times 10^{-128}$    | unknown [ <i>Picea sitchensis</i> ]                                                                                          |
| 6   | uninformative                                                              | -0.8629 | $1.68884 \times 10^{-05}$ | ERN01515.1                          | 0                          | hypothetical protein AMTR_s00002p00270610<br>[ <i>Amborella trichopoda</i> ]                                                 |
| 7   | chaperone protein<br>ClpB3,<br>mitochondrial-like<br>isoform X1            | -0.8528 | $2.69559 \times 10^{-05}$ | XP_010665999.1                      | 0                          | PREDICTED: chaperone protein ClpB4,<br>mitochondrial [ <i>Beta vulgaris</i> subsp. <i>vulgaris</i> ]                         |
| 8   | awaiting functional<br>assignment<br>amidophosphoribosy                    | -0.8507 | $2.9658 \times 10^{-05}$  | XP_006577150.1                      | $1.36 \times 10^{-132}$    | PREDICTED: uncharacterized protein C57A7.06-<br>like isoform X1 [ <i>Glycine max</i> ]                                       |
| 9   | ltransferase 2,<br>chloroplastic-like                                      | -0.8488 | $3.21936 \times 10^{-05}$ | XP_010247381.1                      | 0                          | PREDICTED: amidophosphoribosyltransferase,<br>chloroplastic-like [ <i>Nelumbo nucifera</i> ]                                 |
| 10  | uncharacterized<br>protein isoform 1                                       | -0.8484 | $3.27887 \times 10^{-05}$ | XP_010263219.1                      | $4.20 \times 10^{-53}$     | PREDICTED: uncharacterized protein<br>LOC104601549 [ <i>Nelumbo nucifera</i> ]                                               |
| 11  | uninformative                                                              | -0.8473 | $3.42711 \times 10^{-05}$ | ABK25240.1                          | 0                          | unknown [ <i>Picea sitchensis</i> ]                                                                                          |
| 12  | not annotated                                                              | -0.8459 | $3.63909 \times 10^{-05}$ | ADE75793.1                          | $3.00 \times 10^{-71}$     | unknown [ <i>Picea sitchensis</i> ]                                                                                          |
| 13  | uninformative                                                              | -0.8459 | $3.65153 \times 10^{-05}$ | XP_001766925.1                      | $3.68 \times 10^{-98}$     | predicted protein [ <i>Physcomitrella patens</i> ]                                                                           |
| 14  | not annotated                                                              | -0.8424 | $4.21612 \times 10^{-05}$ | XP_011620903.1                      | $4.63 \times 10^{-66}$     | PREDICTED: uncharacterized protein<br>LOC18427592 isoform X2 [ <i>Amborella<br/>trichopoda</i> ]                             |
| 15  | not annotated                                                              | -0.8414 | $4.39415 \times 10^{-05}$ | XP_006853427.1                      | $7.03 \times 10^{-115}$    | PREDICTED: uncharacterized protein At4g19900<br>isoform X1 [ <i>Amborella trichopoda</i> ]                                   |

|    |                      |         |                           |                |                         |                                                       |
|----|----------------------|---------|---------------------------|----------------|-------------------------|-------------------------------------------------------|
|    | putative             |         |                           |                |                         |                                                       |
|    | pentatricopeptide    |         |                           |                |                         | PREDICTED: putative pentatricopeptide repeat-         |
| 16 | repeat-containing    | -0.8405 | $4.57032 \times 10^{-05}$ | XP_010938939.1 | 0                       | containing protein At5g06400, mitochondrial           |
|    | protein At5g06400,   |         |                           |                |                         | [ <i>Elaeis guineensis</i> ]                          |
|    | mitochondrial        |         |                           |                |                         |                                                       |
|    | methyl-CpG-binding   |         |                           |                |                         | PREDICTED: methyl-CpG-binding domain-                 |
| 17 | domain-containing    | -0.8398 | $4.70182 \times 10^{-05}$ | XP_011624098.1 | $5.71 \times 10^{-23}$  | containing protein 5 isoform X3 [ <i>Amborella</i>    |
|    | protein 5-like       |         |                           |                |                         | <i>trichopoda</i> ]                                   |
| 18 | GCN5-like N-         | -0.8395 | $4.75821 \times 10^{-05}$ | ABK22519.1     | $7.28 \times 10^{-111}$ | unknown [ <i>Picea sitchensis</i> ]                   |
|    | acetyltransferase    |         |                           |                |                         |                                                       |
| 19 | not annotated        | -0.8391 | $4.83334 \times 10^{-05}$ | XP_006376149.1 | $2.06 \times 10^{-67}$  | hypothetical protein POPTR_0013s10250g                |
|    |                      |         |                           |                |                         | [ <i>Populus trichocarpa</i> ]                        |
|    | pentatricopeptide    |         |                           |                |                         |                                                       |
| 20 | repeat-containing    | -0.8381 | $5.02879 \times 10^{-05}$ | XP_010255813.1 | 0                       | PREDICTED: pentatricopeptide repeat-containing        |
|    | protein At4g20740-   |         |                           |                |                         | protein At4g20740 [ <i>Nelumbo nucifera</i> ]         |
|    | like                 |         |                           |                |                         |                                                       |
| 21 | not annotated        | -0.8380 | $5.05526 \times 10^{-05}$ | XP_010259232.1 | $5.38 \times 10^{-81}$  | PREDICTED: DNA replication complex GINS               |
|    |                      |         |                           |                |                         | protein SLD5 [ <i>Nelumbo nucifera</i> ]              |
|    | RNA recognition      |         |                           |                |                         |                                                       |
| 22 | motif-containing     | -0.8379 | $5.07924 \times 10^{-05}$ | ADE77701.1     | $5.27 \times 10^{-107}$ | unknown [ <i>Picea sitchensis</i> ]                   |
|    | protein              |         |                           |                |                         |                                                       |
| 23 | not annotated        | -0.8378 | $5.10092 \times 10^{-05}$ | ABR17863.1     | $4.48 \times 10^{-160}$ | unknown [ <i>Picea sitchensis</i> ]                   |
| 24 | glucan synthase-like | -0.8359 | $5.51103 \times 10^{-05}$ | XP_009608250.1 | $1.92 \times 10^{-52}$  | PREDICTED: callose synthase 3-like [ <i>Nicotiana</i> |
|    | 3                    |         |                           |                |                         | <i>tomentosiformis</i> ]                              |
| 25 | uninformative        | -0.8345 | $5.80868 \times 10^{-05}$ | XP_010272245.1 | 0                       | PREDICTED: protein furry homolog-like                 |
|    |                      |         |                           |                |                         | [ <i>Nelumbo nucifera</i> ]                           |
| 26 | uninformative        | -0.8330 | $6.1702 \times 10^{-05}$  | ADE77306.1     | $1.03 \times 10^{-55}$  | unknown [ <i>Picea sitchensis</i> ]                   |
| 27 | dihydropyrimidinase  | -0.8326 | $6.26223 \times 10^{-05}$ | ABR16534.1     | $1.10 \times 10^{-115}$ | unknown [ <i>Picea sitchensis</i> ]                   |
|    | -like                |         |                           |                |                         |                                                       |
| 28 | uninformative        | -0.8322 | $6.35978 \times 10^{-05}$ | XP_002967506.1 | $1.33 \times 10^{-78}$  | hypothetical protein SELMODRAFT_408574                |
|    |                      |         |                           |                |                         | [ <i>Selaginella moellendorffii</i> ]                 |
| 29 | not annotated        | -0.8321 | $6.38739 \times 10^{-05}$ | ABR16124.1     | 0                       | unknown [ <i>Picea sitchensis</i> ]                   |
| 30 | tetraspanin family   | -0.8313 | $6.58096 \times 10^{-05}$ | ADE76479.1     | $6.45 \times 10^{-89}$  | unknown [ <i>Picea sitchensis</i> ]                   |
|    | protein              |         |                           |                |                         |                                                       |

Table S11. KEGG enrichment result for genes with the top 30 highest negative GS values in the turquoise module.

| KEGG A class                      | KEGG B class                         | Pathway                                     | Count<br>(7 in total) | Pathway ID |
|-----------------------------------|--------------------------------------|---------------------------------------------|-----------------------|------------|
| Metabolism                        | Global and overview maps             | Metabolic pathways                          | 3                     | ko01100    |
| Metabolism                        | Global and overview maps             | Biosynthesis of secondary metabolites       | 2                     | ko01110    |
| Metabolism                        | Nucleotide metabolism                | Purine metabolism                           | 1                     | ko00230    |
| Metabolism                        | Nucleotide metabolism                | Pyrimidine metabolism                       | 1                     | ko00240    |
| Metabolism                        | Amino acid metabolism                | Alanine, aspartate and glutamate metabolism | 1                     | ko00250    |
| Metabolism                        | Metabolism of other amino acids      | beta-Alanine metabolism                     | 1                     | ko00410    |
| Metabolism                        | Carbohydrate metabolism              | Starch and sucrose metabolism               | 1                     | ko00500    |
| Metabolism                        | Metabolism of cofactors and vitamins | Pantothenate and CoA biosynthesis           | 1                     | ko00770    |
| Genetic Information<br>Processing | Translation                          | Ribosome biogenesis in eukaryotes           | 1                     | ko03008    |
| Genetic Information<br>Processing | Translation                          | RNA transport                               | 1                     | ko03013    |
| Genetic Information<br>Processing | Folding, sorting and degradation     | Protein export                              | 1                     | ko03060    |
| Cellular Processes                | Transport and catabolism             | Peroxisome                                  | 1                     | ko04146    |

Table S12. KEGG enrichment result for genes with the top 30 highest IC values in the yellow module.

| KEGG A class                         | KEGG B class                                | Pathway                                             | Count<br>(18 in total) | Pathway ID |
|--------------------------------------|---------------------------------------------|-----------------------------------------------------|------------------------|------------|
| Metabolism                           | Global and overview maps                    | Metabolic pathways                                  | 15                     | ko01100    |
| Metabolism                           | Global and overview maps                    | Biosynthesis of secondary metabolites               | 15                     | ko01110    |
| Metabolism                           | Biosynthesis of other secondary metabolites | Flavonoid biosynthesis                              | 9                      | ko00941    |
| Organismal Systems                   | Environmental adaptation                    | Circadian rhythm - plant                            | 3                      | ko04712    |
| Metabolism                           | Biosynthesis of other secondary metabolites | Phenylpropanoid biosynthesis                        | 2                      | ko00940    |
| Metabolism                           | Global and overview maps                    | Carbon metabolism                                   | 2                      | ko01200    |
| Metabolism                           | Carbohydrate metabolism                     | Glycolysis / Gluconeogenesis                        | 1                      | ko00010    |
| Metabolism                           | Carbohydrate metabolism                     | Citrate cycle (TCA cycle)                           | 1                      | ko00020    |
| Metabolism                           | Metabolism of cofactors and vitamins        | Ubiquinone and other terpenoid-quinone biosynthesis | 1                      | ko00130    |
| Metabolism                           | Amino acid metabolism                       | Cysteine and methionine metabolism                  | 1                      | ko00270    |
| Metabolism                           | Amino acid metabolism                       | Lysine degradation                                  | 1                      | ko00310    |
| Metabolism                           | Amino acid metabolism                       | Tryptophan metabolism                               | 1                      | ko00380    |
| Metabolism                           | Amino acid metabolism                       | Phenylalanine, tyrosine and tryptophan biosynthesis | 1                      | ko00400    |
| Metabolism                           | Lipid metabolism                            | Glycerolipid metabolism                             | 1                      | ko00561    |
| Metabolism                           | Carbohydrate metabolism                     | Pyruvate metabolism                                 | 1                      | ko00620    |
| Metabolism                           | Carbohydrate metabolism                     | Glyoxylate and dicarboxylate metabolism             | 1                      | ko00630    |
| Metabolism                           | Carbohydrate metabolism                     | Propanoate metabolism                               | 1                      | ko00640    |
| Metabolism                           | Metabolism of cofactors and vitamins        | Vitamin B6 metabolism                               | 1                      | ko00750    |
| Metabolism                           | Biosynthesis of other secondary metabolites | Flavone and flavonol biosynthesis                   | 1                      | ko00944    |
| Metabolism                           | Global and overview maps                    | Biosynthesis of amino acids                         | 1                      | ko01230    |
| Environmental Information Processing | Membrane transport                          | ABC transporters                                    | 1                      | ko02010    |
| Environmental Information Processing | Signal transduction                         | MAPK signaling pathway - plant                      | 1                      | ko04016    |

Table S13. Genes with the top 30 highest GS values for nematode population in the yellow module.

| No. | Gene annotation                                                                             | GS     | GS<br><i>p</i> value      | Homologous<br>protein GenBank<br>ID | Blast nr<br><i>p</i> value | Protein name                                                                                                          |
|-----|---------------------------------------------------------------------------------------------|--------|---------------------------|-------------------------------------|----------------------------|-----------------------------------------------------------------------------------------------------------------------|
| 1   | serine<br>carboxypeptidase-<br>like 20-like                                                 | 0.8481 | $3.31576 \times 10^{-05}$ | ABR16352.1                          | $2.10 \times 10^{-136}$    | unknown [ <i>Picea sitchensis</i> ]                                                                                   |
| 2   | DNA binding protein                                                                         | 0.8375 | $5.16089 \times 10^{-05}$ | XP_008782582.1                      | $1.20 \times 10^{-29}$     | PREDICTED: putative transcription factor<br>bHLH041 [ <i>Phoenix dactylifera</i> ]                                    |
| 3   | serine<br>carboxypeptidase-<br>like 20-like                                                 | 0.8366 | $5.34412 \times 10^{-05}$ | ABR16352.1                          | 0                          | unknown [ <i>Picea sitchensis</i> ]                                                                                   |
| 4   | 3-ketoacyl-CoA<br>thiolase 2                                                                | 0.8271 | $7.7402 \times 10^{-05}$  | ADE77908.1                          | 0                          | unknown [ <i>Picea sitchensis</i> ]                                                                                   |
| 5   | flavonoid 3'-<br>monooxygenase-like                                                         | 0.8260 | $8.04993 \times 10^{-05}$ | ABR16821.1                          | $2.27 \times 10^{-136}$    | unknown [ <i>Picea sitchensis</i> ]                                                                                   |
| 6   | flavonoid 3'-<br>monooxygenase                                                              | 0.8229 | $9.05631 \times 10^{-05}$ | ABR16821.1                          | $9.19 \times 10^{-146}$    | unknown [ <i>Picea sitchensis</i> ]                                                                                   |
| 7   | serine<br>carboxypeptidase-<br>like 3                                                       | 0.8101 | 0.000142025               | XP_010936152.1                      | $3.08 \times 10^{-67}$     | PREDICTED: serine carboxypeptidase-like 18<br>isoform X2 [ <i>Elaeis guineensis</i> ]                                 |
| 8   | pleiotropic drug<br>resistance protein 1-<br>like                                           | 0.8078 | 0.000153718               | XP_010273226.1                      | $3.32 \times 10^{-143}$    | PREDICTED: pleiotropic drug resistance<br>protein 1-like [ <i>Nelumbo nucifera</i> ]                                  |
| 9   | UPF0468 protein<br>CG5343-like                                                              | 0.8005 | 0.00019535                | ABK25880.1                          | $6.61 \times 10^{-39}$     | unknown [ <i>Picea sitchensis</i> ]                                                                                   |
| 10  | alpha-1,6-mannosyl-<br>glycoprotein 2-beta-<br>N-<br>acetylglucosaminyltr<br>ansferase-like | 0.7960 | 0.000225439               | XP_010906223.1                      | $3.13 \times 10^{-160}$    | PREDICTED: alpha-1,6-mannosyl-glycoprotein<br>2-beta-N-acetylglucosaminyltransferase [ <i>Elaeis<br/>guineensis</i> ] |
| 11  | gd2b, putative                                                                              | 0.7959 | 0.000226119               | ABR18114.1                          | 0                          | unknown [ <i>Picea sitchensis</i> ]                                                                                   |
| 12  | 14-3-3-like protein-<br>like                                                                | 0.7916 | 0.00025844                | ABK21293.1                          | $1.33 \times 10^{-143}$    | unknown [ <i>Picea sitchensis</i> ]                                                                                   |
| 13  | digalactosyldiacylgly<br>cerol synthase 1,<br>chloroplastic                                 | 0.7881 | 0.000287973               | XP_002264659.1                      | 0                          | PREDICTED: digalactosyldiacylglycerol<br>synthase 1, chloroplastic [ <i>Vitis vinifera</i> ]                          |
| 14  | probable mannitol<br>dehydrogenase-like                                                     | 0.7782 | 0.000385345               | ABK26008.1                          | $2.27 \times 10^{-153}$    | unknown [ <i>Picea sitchensis</i> ]                                                                                   |
| 15  | FAD-dependent urate<br>hydroxylase-like                                                     | 0.7773 | 0.000394403               | XP_006838554.1                      | $5.61 \times 10^{-145}$    | PREDICTED: zeaxanthin epoxidase,<br>chloroplastic [ <i>Amborella trichopoda</i> ]                                     |

|    |                                                                    |        |             |                |                         |                                                                                                     |
|----|--------------------------------------------------------------------|--------|-------------|----------------|-------------------------|-----------------------------------------------------------------------------------------------------|
| 16 | not annotated                                                      | 0.7762 | 0.000407237 | ACN40312.1     | 0                       | unknown [ <i>Picea sitchensis</i> ]                                                                 |
| 17 | uninformative                                                      | 0.7734 | 0.000441315 | B8LPG7.1       | $2.77 \times 10^{-128}$ | RecName: Full=Anamorsin homolog 2;<br>AltName: Full=Fe-S cluster assembly protein<br>DRE2 homolog 2 |
| 18 | unknown                                                            | 0.7684 | 0.000506061 | ABR18272.1     | $2.43 \times 10^{-53}$  | unknown [ <i>Picea sitchensis</i> ]                                                                 |
| 19 | protein SRG1-like                                                  | 0.7639 | 0.000572338 | AAA85365.1     | $7.17 \times 10^{-115}$ | ethylene-forming enzyme [ <i>Picea glauca</i> ]                                                     |
| 20 | uninformative                                                      | 0.7608 | 0.000621668 | XP_010939602.1 | 0                       | PREDICTED: uncharacterized protein<br>LOC105058381 isoform X2 [ <i>Elaeis guineensis</i> ]          |
| 21 | NADPH<br>oxidoreductase,<br>putative                               | 0.7582 | 0.000664766 | CAI56321.1     | 0                       | TPA: leucoanthocyanidin reductase [ <i>Pinus<br/>taeda</i> ]                                        |
| 22 | major facilitator<br>family protein                                | 0.7570 | 0.000685331 | ABR18255.1     | 0                       | unknown [ <i>Picea sitchensis</i> ]                                                                 |
| 23 | Transcription factor<br>AtMYC2, putative<br>proline-rich receptor- | 0.7511 | 0.000797278 | ABR16623.1     | 0                       | unknown [ <i>Picea sitchensis</i> ]                                                                 |
| 24 | like protein kinase<br>PERK13-like                                 | 0.7509 | 0.000802253 | XP_011625141.1 | 0                       | PREDICTED: chitin elicitor receptor kinase 1<br>[ <i>Amborella trichopoda</i> ]                     |
| 25 | not annotated                                                      | 0.7482 | 0.000857794 | ABK21817.1     | $3.60 \times 10^{-69}$  | unknown [ <i>Picea sitchensis</i> ]                                                                 |
| 26 | 1,4-dihydroxy-2-<br>naphthoyl-CoA<br>thioesterase 1                | 0.7471 | 0.000881101 | ABK24103.1     | $1.66 \times 10^{-81}$  | unknown [ <i>Picea sitchensis</i> ]                                                                 |
| 27 | MATE efflux family<br>protein 6 isoform X1<br>(+)-pulegone         | 0.7466 | 0.00089286  | XP_006843973.1 | $3.35 \times 10^{-150}$ | PREDICTED: MATE efflux family protein 5<br>isoform X1 [ <i>Amborella trichopoda</i> ]               |
| 28 | reductase-like,<br>partial                                         | 0.7446 | 0.000936378 | ABR17262.1     | $8.48 \times 10^{-113}$ | unknown [ <i>Picea sitchensis</i> ]                                                                 |
| 29 | chalcone synthase 1<br>isoform X1                                  | 0.7445 | 0.000938956 | AGY80771.1     | 0                       | chalcone synthase [ <i>Pinus radiata</i> ]                                                          |
| 30 | Chalcone synthase                                                  | 0.7420 | 0.000999184 | AGU43679.1     | 0                       | pinocembrin chalcone synthase [ <i>Pinus<br/>massoniana</i> ]                                       |

Table S14. KEGG enrichment result for genes with the top 30 highest GS values in the yellow module.

| KEGG A class                         | KEGG B class                                | Pathway                                    | Count<br>(15 in total) | Pathway ID |
|--------------------------------------|---------------------------------------------|--------------------------------------------|------------------------|------------|
| Metabolism                           | Global and overview maps                    | Metabolic pathways                         | 11                     | ko01100    |
| Metabolism                           | Global and overview maps                    | Biosynthesis of secondary metabolites      | 9                      | ko01110    |
| Metabolism                           | Biosynthesis of other secondary metabolites | Flavonoid biosynthesis                     | 6                      | ko00941    |
| Metabolism                           | Biosynthesis of other secondary metabolites | Flavone and flavonol biosynthesis          | 2                      | ko00944    |
| Environmental Information Processing | Signal transduction                         | Plant hormone signal transduction          | 2                      | ko04075    |
| Organismal Systems                   | Environmental adaptation                    | Circadian rhythm - plant                   | 2                      | ko04712    |
| Metabolism                           | Carbohydrate metabolism                     | Glycolysis / Gluconeogenesis               | 1                      | ko00010    |
| Metabolism                           | Lipid metabolism                            | Fatty acid degradation                     | 1                      | ko00071    |
| Metabolism                           | Amino acid metabolism                       | Valine, leucine and isoleucine degradation | 1                      | ko00280    |
| Metabolism                           | Glycan biosynthesis and metabolism          | N-Glycan biosynthesis                      | 1                      | ko00510    |
| Metabolism                           | Glycan biosynthesis and metabolism          | Various types of N-glycan biosynthesis     | 1                      | ko00513    |
| Metabolism                           | Lipid metabolism                            | Glycerolipid metabolism                    | 1                      | ko00561    |
| Metabolism                           | Lipid metabolism                            | alpha-Linolenic acid metabolism            | 1                      | ko00592    |
| Metabolism                           | Carbohydrate metabolism                     | Pyruvate metabolism                        | 1                      | ko00620    |
| Metabolism                           | Carbohydrate metabolism                     | Glyoxylate and dicarboxylate metabolism    | 1                      | ko00630    |
| Metabolism                           | Carbohydrate metabolism                     | Propanoate metabolism                      | 1                      | ko00640    |
| Metabolism                           | Metabolism of terpenoids and polyketides    | Carotenoid biosynthesis                    | 1                      | ko00906    |
| Metabolism                           | Energy metabolism                           | Nitrogen metabolism                        | 1                      | ko00910    |
| Metabolism                           | Lipid metabolism                            | Biosynthesis of unsaturated fatty acids    | 1                      | ko01040    |
| Metabolism                           | Global and overview maps                    | Carbon metabolism                          | 1                      | ko01200    |
| Metabolism                           | Global and overview maps                    | Fatty acid metabolism                      | 1                      | ko01212    |
| Environmental Information Processing | Membrane transport                          | ABC transporters                           | 1                      | ko02010    |
| Environmental Information Processing | Signal transduction                         | MAPK signaling pathway - plant             | 1                      | ko04016    |
| Cellular Processes                   | Transport and catabolism                    | Peroxisome                                 | 1                      | ko04146    |



Table S15. Network genes for the yellow module.

| No. | Gene annotation                                                 | IC      | GS     | MM     | Homologous protein<br>GenBank ID | Protein name                                                                              | Blast nr<br><i>p</i> value |
|-----|-----------------------------------------------------------------|---------|--------|--------|----------------------------------|-------------------------------------------------------------------------------------------|----------------------------|
| 1   | (+)-pulegone reductase-like, partial                            | 56.6806 | 0.7446 | 0.9682 | ABR17262.1                       | unknown [ <i>Picea sitchensis</i> ]                                                       | 8.48×10 <sup>-113</sup>    |
| 2   | chalcone--flavonone isomerase 2                                 | 56.1381 | 0.6990 | 0.9746 | ADE77594.1                       | unknown [ <i>Picea sitchensis</i> ]                                                       | 0                          |
| 3   | chalcone synthase 2                                             | 55.5254 | 0.7063 | 0.9746 | AEN84256.1                       | chalcone synthase, partial [ <i>Picea sitchensis</i> ]                                    | 0                          |
| 4   | digalactosyldiacylglycerol synthase 1, chloroplastic            | 53.7546 | 0.7881 | 0.9604 | XP_002264659.1                   | PREDICTED: digalactosyldiacylglycerol synthase 1, chloroplastic [ <i>Vitis vinifera</i> ] | 0                          |
| 5   | chalcone synthase 2                                             | 52.1909 | 0.6703 | 0.9467 | CAA05214.1                       | chalcone synthase-like protein [ <i>Pinus strobus</i> ]                                   | 0                          |
| 6   | NADPH oxidoreductase, putative                                  | 51.8365 | 0.7582 | 0.9472 | CAI56321.1                       | TPA: leucoanthocyanidin reductase [ <i>Pinus taeda</i> ]                                  | 0                          |
| 7   | chalcone synthase                                               | 51.7885 | 0.7330 | 0.9496 | AEN84256.1                       | chalcone synthase, partial [ <i>Picea sitchensis</i> ]                                    | 5.24×10 <sup>-129</sup>    |
| 8   | receptor-like protein kinase HSL1-like                          | 51.4997 | 0.6073 | 0.9420 | XP_012092411.1                   | PREDICTED: receptor-like protein kinase HSL1 [ <i>Jatropha curcas</i> ]                   | 0                          |
| 9   | 1-aminocyclopropane-1-carboxylate synthase                      | 51.4890 | 0.6517 | 0.9420 | ABM60748.1                       | ACC synthase [ <i>Picea engelmannii</i> × <i>Picea glauca</i> ]                           | 0                          |
| 10  | pleiotropic drug resistance protein 1-like                      | 51.2802 | 0.6587 | 0.9286 | XP_010249930.1                   | PREDICTED: pleiotropic drug resistance protein 1-like [ <i>Nelumbo nucifera</i> ]         | 2.45×10 <sup>-134</sup>    |
| 11  | chorismate mutase                                               | 51.1037 | 0.6780 | 0.9502 | XP_006857227.2                   | PREDICTED: chorismate mutase 1, chloroplastic [ <i>Amborella trichopoda</i> ]             | 2.02×10 <sup>-85</sup>     |
| 12  | Os09g0332600                                                    | 50.9143 | 0.7011 | 0.9273 | KVI05977.1                       | hypothetical protein Ccrd_015657 [ <i>Cynara cardunculus</i> var. <i>scolymus</i> ]       | 0                          |
| 13  | cinnamoyl-CoA reductase, putative                               | 50.8942 | 0.6314 | 0.9298 | AFC38436.1                       | cinnamoyl-CoA reductase [ <i>Pinus radiata</i> ]                                          | 4.04×10 <sup>-161</sup>    |
| 14  | Leucoanthocyanidin dioxygenase family protein                   | 49.3838 | 0.6814 | 0.9395 | AHW42460.1                       | GA2ox10 [ <i>Pinus tabulaeformis</i> ]                                                    | 3.20×10 <sup>-177</sup>    |
| 15  | chalcone synthase                                               | 48.2038 | 0.7420 | 0.9364 | AGU43679.1                       | pinocembrin chalcone synthase [ <i>Pinus massoniana</i> ]                                 | 0                          |
| 16  | phospholipid-transporting ATPase 1                              | 47.6266 | 0.7132 | 0.9166 | XP_002271241.2                   | PREDICTED: phospholipid-transporting ATPase 1 [ <i>Vitis vinifera</i> ]                   | 0                          |
| 17  | AMP dependent CoA ligase, putative                              | 47.6191 | 0.5341 | 0.9382 | AGX45528.1                       | 4-coumarate:CoA ligase [ <i>Pinus taeda</i> ]                                             | 0                          |
| 18  | chalcone synthase 1-like                                        | 47.5932 | 0.6804 | 0.9432 | ABK24577.1                       | unknown [ <i>Picea sitchensis</i> ]                                                       | 0                          |
| 19  | dihydrolipoyllysine-residue succinyltransferase component of 2- | 46.8763 | 0.6204 | 0.9375 | ADE77401.1                       | unknown [ <i>Picea sitchensis</i> ]                                                       | 0                          |

|    |                                                               |         |        |        |                |                                                                                           |                         |
|----|---------------------------------------------------------------|---------|--------|--------|----------------|-------------------------------------------------------------------------------------------|-------------------------|
|    | oxoglutarate<br>dehydrogenase complex<br>1, mitochondrial     |         |        |        |                |                                                                                           |                         |
| 20 | oxalate--CoA ligase-like                                      | 46.4977 | 0.5413 | 0.9282 | ABR16382.1     | unknown [ <i>Picea sitchensis</i> ]                                                       | 0                       |
| 21 | kinase, putative                                              | 46.3291 | 0.6360 | 0.9217 | XP_006856200.1 | PREDICTED: wall-associated receptor kinase-like<br>14 [ <i>Amborella trichopoda</i> ]     | $4.05 \times 10^{-163}$ |
| 22 | not_annotated                                                 | 46.2297 | 0.7762 | 0.9342 | ACN40312.1     | unknown [ <i>Picea sitchensis</i> ]                                                       | 0                       |
| 23 | 3-ketoacyl-CoA thiolase<br>B, putative                        | 45.4468 | 0.6005 | 0.9304 | EMS60447.1     | 3-ketoacyl-CoA thiolase 2, peroxisomal [ <i>Triticum<br/>urartu</i> ]                     | $1.67 \times 10^{-93}$  |
| 24 | ATP-binding cassette<br>transporter<br>probable voltage-gated | 45.2665 | 0.6962 | 0.8997 | XP_010273226.1 | PREDICTED: pleiotropic drug resistance protein 1-<br>like [ <i>Nelumbo nucifera</i> ]     | $3.94 \times 10^{-118}$ |
| 25 | potassium channel<br>subunit beta-like                        | 45.0376 | 0.5778 | 0.9425 | ABK21055.1     | unknown [ <i>Picea sitchensis</i> ]                                                       | 0                       |
| 26 | trans-cinnamate 4-<br>monooxygenase-like                      | 45.0329 | 0.6360 | 0.9529 | AAD23378.1     | trans-cinnamate 4-hydroxylase [ <i>Pinus taeda</i> ]                                      | 0                       |
| 27 | leucoanthocyanidin<br>dioxygenase family<br>protein           | 44.9619 | 0.6793 | 0.9238 | AHW42460.1     | GA2ox10 [ <i>Pinus tabulaeformis</i> ]                                                    | $2.34 \times 10^{-166}$ |
| 28 | pleiotropic drug<br>resistance protein 1-like                 | 44.2948 | 0.8078 | 0.9146 | XP_010273226.1 | PREDICTED: pleiotropic drug resistance protein 1-<br>like [ <i>Nelumbo nucifera</i> ]     | $3.32 \times 10^{-143}$ |
| 29 | not annotated                                                 | 44.0103 | 0.7232 | 0.9318 | AAP85250.1     | phenylalanine ammonia-lyase [ <i>Pinus pinaster</i> ]                                     | 0                       |
| 30 | probable chalcone--<br>flavonone isomerase 3                  | 43.6128 | 0.6644 | 0.9295 | ABK23299.1     | unknown [ <i>Picea sitchensis</i> ]                                                       | $1.91 \times 10^{-95}$  |
| 31 | carboxylesterase np,<br>putative                              | 43.5740 | 0.6590 | 0.8968 | XP_010266577.1 | PREDICTED: uncharacterized protein<br>LOC104604050 isoform X1 [ <i>Nelumbo nucifera</i> ] | $5.78 \times 10^{-128}$ |
| 32 | phospholipid/glycerol<br>acyltransferase family<br>protein    | 43.0202 | 0.6095 | 0.9293 | ABR17313.1     | unknown [ <i>Picea sitchensis</i> ]                                                       | 0                       |
| 33 | Os09g0332600                                                  | 42.9770 | 0.7291 | 0.9022 | XP_010910610.1 | PREDICTED: pleiotropic drug resistance protein 3-<br>like [ <i>Elaeis guineensis</i> ]    | 0                       |
| 34 | proline-rich receptor-<br>like protein kinase<br>PERK13-like  | 42.4859 | 0.7509 | 0.9344 | XP_011625141.1 | PREDICTED: chitin elicitor receptor kinase 1<br>[ <i>Amborella trichopoda</i> ]           | 0                       |
| 35 | not_annotated                                                 | 42.2507 | 0.7129 | 0.8830 | XP_006855017.1 | PREDICTED: F-box/LRR-repeat protein At1g67190<br>[ <i>Amborella trichopoda</i> ]          | 0                       |

|    |                                                            |         |        |        |                |                                                                                               |                         |
|----|------------------------------------------------------------|---------|--------|--------|----------------|-----------------------------------------------------------------------------------------------|-------------------------|
|    | S-adenosylmethionine-dependent methyltransferase, putative | 42.1960 | 0.6760 | 0.9190 | CBI30090.3     | unnamed protein product [ <i>Vitis vinifera</i> ]                                             | 1.55×10 <sup>-131</sup> |
| 36 |                                                            |         |        |        |                |                                                                                               |                         |
| 37 | leucoanthocyanidin dioxygenase-like                        | 41.9900 | 0.6905 | 0.9172 | ABK24773.1     | unknown [ <i>Picea sitchensis</i> ]                                                           | 1.03×10 <sup>-96</sup>  |
| 38 | leucoanthocyanidin dioxygenase family protein              | 41.3561 | 0.6974 | 0.9020 | AHW42460.1     | GA2ox10 [ <i>Pinus tabulaeformis</i> ]                                                        | 1.01×10 <sup>-92</sup>  |
| 39 | uninformative                                              | 41.0187 | 0.7734 | 0.8943 | B8LPG7.1       | RecName: Full=Anamorsin homolog 2; AltName: Full=Fe-S cluster assembly protein DRE2 homolog 2 | 2.77×10 <sup>-128</sup> |
| 40 | probable mannitol dehydrogenase-like                       | 40.8904 | 0.7782 | 0.8969 | ABK26008.1     | unknown [ <i>Picea sitchensis</i> ]                                                           | 2.27×10 <sup>-153</sup> |
| 41 | not annotated                                              | 40.8380 | 0.6281 | 0.9360 | ABK21911.1     | unknown [ <i>Picea sitchensis</i> ]                                                           | 0                       |
| 42 | transcription factor AtMYC2, putative                      | 40.7092 | 0.7511 | 0.8872 | ABR16623.1     | unknown [ <i>Picea sitchensis</i> ]                                                           | 0                       |
| 43 | leucoanthocyanidin dioxygenase                             | 40.5531 | 0.6737 | 0.9123 | AHW42460.1     | GA2ox10 [ <i>Pinus tabulaeformis</i> ]                                                        | 3.19×10 <sup>-141</sup> |
| 44 | flavonoid 3',5'-hydroxylase 2                              | 39.3982 | 0.6678 | 0.8965 | ABR16821.1     | unknown [ <i>Picea sitchensis</i> ]                                                           | 0                       |
| 45 | oligopeptide transporter 7-like isoform X2                 | 38.4851 | 0.6047 | 0.9400 | XP_008806363.1 | PREDICTED: oligopeptide transporter 7-like [ <i>Phoenix dactylifera</i> ]                     | 0                       |
| 46 | ATP-citrate synthase beta chain protein 1-like             | 38.3733 | 0.5246 | 0.9003 | ACN40574.1     | unknown [ <i>Picea sitchensis</i> ]                                                           | 0                       |
| 47 | malic enzyme, putative                                     | 37.9654 | 0.6547 | 0.9356 | ABR18338.1     | unknown [ <i>Picea sitchensis</i> ]                                                           | 0                       |
| 48 | serine/threonine kinase, putative                          | 37.9482 | 0.6445 | 0.9222 | XP_006845584.1 | PREDICTED: CBL-interacting serine/threonine-protein kinase 21 [ <i>Amborella trichopoda</i> ] | 7.04×10 <sup>-137</sup> |
| 49 | protein<br>TRANSPARENT TESTA 12                            | 37.8402 | 0.6048 | 0.9098 | AKC96391.1     | multidrug and toxin compound extrusion protein [ <i>Pinus radiata</i> ]                       | 0                       |

|    |                                              |         |        |        |                |                                                                                                |                         |
|----|----------------------------------------------|---------|--------|--------|----------------|------------------------------------------------------------------------------------------------|-------------------------|
| 50 | anthocyanidin reductase                      | 37.3895 | 0.5996 | 0.8979 | ABR18365.1     | unknown [ <i>Picea sitchensis</i> ]                                                            | $9.10 \times 10^{-159}$ |
| 51 | geraniol 8-hydroxylase-like                  | 36.7439 | 0.6637 | 0.8869 | ABK24553.1     | unknown [ <i>Picea sitchensis</i> ]                                                            | 0                       |
| 52 | leucoanthocyanidin dioxygenase isoform X1    | 36.6782 | 0.6136 | 0.9285 | XP_009765337.1 | PREDICTED: protein SRG1-like [ <i>Nicotiana sylvestris</i> ]                                   | $6.30 \times 10^{-114}$ |
| 53 | FAD-dependent urate hydroxylase-like         | 36.4770 | 0.7773 | 0.8800 | XP_006838554.1 | PREDICTED: zeaxanthin epoxidase, chloroplastic [ <i>Amborella trichopoda</i> ]                 | $5.61 \times 10^{-145}$ |
| 54 | anthocyanidin reductase                      | 36.0237 | 0.6102 | 0.8896 | ABK24620.1     | unknown [ <i>Picea sitchensis</i> ]                                                            | $3.23 \times 10^{-172}$ |
| 55 | not annotated                                | 35.8647 | 0.7482 | 0.8819 | ABK21817.1     | unknown [ <i>Picea sitchensis</i> ]                                                            | $3.60 \times 10^{-69}$  |
| 56 | cytochrome P450 78A4-like                    | 35.4014 | 0.7148 | 0.9228 | AJP06264.1     | CYP78A1 [ <i>Pinus tabulaeformis</i> ]                                                         | 0                       |
| 57 | not annotated                                | 34.2710 | 0.5008 | 0.8891 | ABR16367.1     | unknown [ <i>Picea sitchensis</i> ]                                                            | $7.40 \times 10^{-177}$ |
| 58 | ocs element-binding factor 1                 | 33.6663 | 0.6296 | 0.9095 | AFG52929.1     | hypothetical protein 0_7512_01, partial [ <i>Pinus taeda</i> ]                                 | $4.28 \times 10^{-22}$  |
| 59 | aconitate hydratase, cytoplasmic-like        | 33.1805 | 0.7341 | 0.8498 | XP_006452377.1 | hypothetical protein CICLE_v10007338mg [ <i>Citrus clementina</i> ]                            | 0                       |
| 60 | not annotated                                | 33.1589 | 0.5065 | 0.9074 | XP_010273789.1 | PREDICTED: ATPase 10, plasma membrane-type-like isoform X1 [ <i>Nelumbo nucifera</i> ]         | 0                       |
| 61 | 1,4-dihydroxy-2-naphthoyl-CoA thioesterase 1 | 33.0205 | 0.6913 | 0.9170 | ABK24103.1     | unknown [ <i>Picea sitchensis</i> ]                                                            | $7.35 \times 10^{-50}$  |
| 62 | leucoanthocyanidin dioxygenase               | 32.3650 | 0.6889 | 0.8607 | AHW42460.1     | GA2ox10 [ <i>Pinus tabulaeformis</i> ]                                                         | $1.70 \times 10^{-163}$ |
| 63 | putative transcription factor bHLH041-like   | 31.7280 | 0.4585 | 0.8671 | XP_004288955.2 | PREDICTED: putative transcription factor bHLH041 [ <i>Fragaria vesca</i> subsp. <i>vesca</i> ] | $2.29 \times 10^{-36}$  |

|    |                                                                             |         |         |         |                |                                                                                                          |                         |
|----|-----------------------------------------------------------------------------|---------|---------|---------|----------------|----------------------------------------------------------------------------------------------------------|-------------------------|
|    | Helicase domain-containing protein / IBR                                    |         |         |         |                |                                                                                                          |                         |
| 64 | domain-containing protein / zinc finger protein-related, putative isoform 1 | 31.6863 | -0.7203 | -0.8644 | XP_010266797.1 | PREDICTED: putative uncharacterized protein At4g01020, chloroplastic [ <i>Nelumbo nucifera</i> ]         | 0                       |
| 65 | transcription factor MYB12-like                                             | 31.2269 | 0.6855  | 0.8933  | XP_009334363.1 | PREDICTED: myb-related protein 308-like [ <i>Pyrus × bretschneideri</i> ]                                | 1.33×10 <sup>-71</sup>  |
| 66 | not annotated                                                               | 31.2214 | 0.5857  | 0.8758  | ACN41013.1     | unknown [ <i>Picea sitchensis</i> ]                                                                      | 0                       |
| 67 | not annotated                                                               | 30.9758 | -0.8330 | -0.8649 | ABK22237.1     | unknown [ <i>Picea sitchensis</i> ]                                                                      | 1.70×10 <sup>-99</sup>  |
| 68 | aluminum activated malate transporter family protein aroenate               | 29.3594 | 0.6337  | 0.9012  | XP_007039541.1 | Aluminum-activated malate transporter 12 [ <i>Theobroma cacao</i> ]                                      | 8.41×10 <sup>-95</sup>  |
| 69 | dehydratase/prephenate dehydratase 6, chloroplastic-like                    | 28.9790 | 0.5940  | 0.9017  | XP_010243735.1 | PREDICTED: aroenate dehydratase/prephenate dehydratase 6, chloroplastic-like [ <i>Nelumbo nucifera</i> ] | 2.70×10 <sup>-154</sup> |
| 70 | aluminum-activated malate transporter 12-like                               | 28.2741 | 0.6435  | 0.8952  | XP_008390303.1 | PREDICTED: aluminum-activated malate transporter 10-like [ <i>Malus domestica</i> ]                      | 9.27×10 <sup>-77</sup>  |
| 71 | AP-2 complex subunit alpha-1                                                | 27.9390 | 0.5882  | 0.8486  | XP_010278258.1 | PREDICTED: AP-2 complex subunit alpha-1-like isoform X1 [ <i>Nelumbo nucifera</i> ]                      | 0                       |
| 72 | phosphatidylinositol-4-phosphate 5-kinase isolog                            | 27.2948 | 0.5995  | 0.8534  | XP_002963939.1 | hypothetical protein SELMODRAFT_230263 [ <i>Selaginella moellendorffii</i> ]                             | 4.13×10 <sup>-109</sup> |
| 73 | not annotated                                                               | 26.7664 | 0.6940  | 0.8806  | ADE76959.1     | unknown [ <i>Picea sitchensis</i> ]                                                                      | 3.97×10 <sup>-105</sup> |
| 74 | flavonol synthase/flavanone 3-hydroxylase                                   | 26.3068 | 0.6614  | 0.8736  | XP_006844783.2 | PREDICTED: protein SRG1 [ <i>Amborella trichopoda</i> ]                                                  | 2.80×10 <sup>-105</sup> |
| 75 | probable terpene synthase 9                                                 | 25.8606 | 0.4299  | 0.8418  | Q84KL5.1       | RecName: Full=Alpha-farnesene synthase [ <i>Pinus taeda</i> ]                                            | 0                       |
| 76 | carbamoyl-phosphate synthase large chain-like                               | 25.3249 | 0.5319  | 0.8678  | XP_009593636.1 | PREDICTED: LOB domain-containing protein 1-like [ <i>Nicotiana tomentosiformis</i> ]                     | 1.26×10 <sup>-41</sup>  |

|    |                                              |         |        |        |                |                                                                                                                   |                         |
|----|----------------------------------------------|---------|--------|--------|----------------|-------------------------------------------------------------------------------------------------------------------|-------------------------|
| 77 | dynamain, putative                           | 25.3123 | 0.6278 | 0.8497 | ABR18441.1     | unknown [ <i>Picea sitchensis</i> ]                                                                               | 0                       |
| 78 | alcohol dehydrogenase-like                   | 25.1284 | 0.6795 | 0.8554 | ABK24305.1     | unknown [ <i>Picea sitchensis</i> ]                                                                               | 0                       |
| 79 | uninformative                                | 24.8370 | 0.4957 | 0.8442 | ADE76466.1     | unknown [ <i>Picea sitchensis</i> ]                                                                               | $4.58 \times 10^{-79}$  |
| 80 | LOB domain-containing protein                | 24.3259 | 0.4804 | 0.8402 | ABK26854.1     | unknown [ <i>Picea sitchensis</i> ]                                                                               | $9.46 \times 10^{-38}$  |
| 81 | alcohol dehydrogenase-like 3-like isoform X2 | 23.2495 | 0.6516 | 0.8559 | ABK25905.1     | unknown [ <i>Picea sitchensis</i> ]                                                                               | $1.72 \times 10^{-168}$ |
| 82 | hypothetical protein                         | 22.8781 | 0.6132 | 0.8649 | XP_002990613.1 | hypothetical protein SELMODRAFT_429046<br>[ <i>Selaginella moellendorffii</i> ]                                   | $1.92 \times 10^{-10}$  |
| 83 | strictosidine synthase 3                     | 20.2302 | 0.4458 | 0.8253 | ABR18211.1     | unknown [ <i>Picea sitchensis</i> ]                                                                               | 0                       |
| 84 | putative cinnamoyl CoA reductase             | 19.4196 | 0.6831 | 0.8114 | ABK24762.1     | unknown [ <i>Picea sitchensis</i> ]                                                                               | $1.76 \times 10^{-162}$ |
| 85 | RING-H2 zinc finger protein RHA1a            | 19.4119 | 0.5481 | 0.8516 | ABK24745.1     | unknown [ <i>Picea sitchensis</i> ]                                                                               | $7.30 \times 10^{-17}$  |
| 86 | uninformative                                | 17.2187 | 0.5155 | 0.8274 | ABR17654.1     | unknown [ <i>Picea sitchensis</i> ]                                                                               | 0                       |
| 87 | anthocyanidin reductase                      | 15.2639 | 0.3806 | 0.8140 | ABR18365.1     | unknown [ <i>Picea sitchensis</i> ]                                                                               | $4.19 \times 10^{-169}$ |
| 88 | glycosyl hydrolase family 9 protein          | 13.3237 | 0.5817 | 0.7378 | CAA52343.1     | cellulase [ <i>Sambucus nigra</i> ]                                                                               | $4.15 \times 10^{-175}$ |
| 89 | flavonoid 3',5'-hydroxylase 2                | 12.5318 | 0.5411 | 0.7257 | ACN40555.1     | unknown [ <i>Picea sitchensis</i> ]                                                                               | 0                       |
| 90 | ATP binding protein, putative                | 9.56913 | 0.5406 | 0.7461 | XP_009418900.1 | PREDICTED: putative receptor-like protein kinase<br>At4g00960 [ <i>Musa acuminata</i> subsp. <i>malaccensis</i> ] | $4.36 \times 10^{-126}$ |

---

|    |                                   |         |        |        |                |                                                                        |                         |
|----|-----------------------------------|---------|--------|--------|----------------|------------------------------------------------------------------------|-------------------------|
| 91 | salt tolerance protein-<br>like   | 9.39871 | 0.6670 | 0.7601 | ABK24665.1     | unknown [ <i>Picea sitchensis</i> ]                                    | $1.58 \times 10^{-129}$ |
| 92 | L-ascorbate oxidase               | 8.53832 | 0.3856 | 0.7203 | ADE75758.1     | unknown [ <i>Picea sitchensis</i> ]                                    | 0                       |
| 93 | lysine histidine<br>transporter 1 | 6.15054 | 0.6016 | 0.6654 | XP_009589743.1 | PREDICTED: GABA transporter 1 [ <i>Nicotiana<br/>tomentosiformis</i> ] | $1.17 \times 10^{-142}$ |

---

Table S16. KEGG enrichment result for genes with the top 30 highest GS values in the yellow module.

| KEGG A class                         | KEGG B class                                | Pathway                                             | Count<br>(47 in total) | Pathway ID |
|--------------------------------------|---------------------------------------------|-----------------------------------------------------|------------------------|------------|
| Metabolism                           | Global and overview maps                    | Metabolic pathways                                  | 37                     | ko01100    |
| Metabolism                           | Global and overview maps                    | Biosynthesis of secondary metabolites               | 32                     | ko01110    |
| Metabolism                           | Biosynthesis of other secondary metabolites | Flavonoid biosynthesis                              | 19                     | ko00941    |
| Metabolism                           | Global and overview maps                    | Carbon metabolism                                   | 6                      | ko01200    |
| Metabolism                           | Global and overview maps                    | Biosynthesis of amino acids                         | 4                      | ko01230    |
| Metabolism                           | Carbohydrate metabolism                     | Glycolysis / Gluconeogenesis                        | 4                      | ko00010    |
| Environmental Information Processing | Membrane transport                          | ABC transporters                                    | 3                      | ko02010    |
| Organismal Systems                   | Environmental adaptation                    | Circadian rhythm - plant                            | 3                      | ko04712    |
| Cellular Processes                   | Transport and catabolism                    | Endocytosis                                         | 3                      | ko04144    |
| Metabolism                           | Energy metabolism                           | Carbon fixation in photosynthetic organisms         | 2                      | ko00710    |
| Metabolism                           | Carbohydrate metabolism                     | Citrate cycle (TCA cycle)                           | 2                      | ko00020    |
| Metabolism                           | Lipid metabolism                            | Fatty acid degradation                              | 2                      | ko00071    |
| Metabolism                           | Biosynthesis of other secondary metabolites | Flavone and flavonol biosynthesis                   | 2                      | ko00944    |
| Metabolism                           | Lipid metabolism                            | Glycerolipid metabolism                             | 2                      | ko00561    |
| Metabolism                           | Carbohydrate metabolism                     | Glyoxylate and dicarboxylate metabolism             | 2                      | ko00630    |
| Environmental Information Processing | Signal transduction                         | MAPK signaling pathway - plant                      | 2                      | ko04016    |
| Metabolism                           | Amino acid metabolism                       | Phenylalanine, tyrosine and tryptophan biosynthesis | 2                      | ko00400    |
| Metabolism                           | Biosynthesis of other secondary metabolites | Phenylpropanoid biosynthesis                        | 2                      | ko00940    |
| Metabolism                           | Carbohydrate metabolism                     | Pyruvate metabolism                                 | 2                      | ko00620    |
| Metabolism                           | Amino acid metabolism                       | Tyrosine metabolism                                 | 2                      | ko00350    |
| Metabolism                           | Global and overview maps                    | 2-Oxocarboxylic acid metabolism                     | 1                      | ko01210    |
| Metabolism                           | Lipid metabolism                            | alpha-Linolenic acid metabolism                     | 1                      | ko00592    |
| Metabolism                           | Carbohydrate metabolism                     | Ascorbate and aldarate metabolism                   | 1                      | ko00053    |
| Metabolism                           | Metabolism of terpenoids and polyketides    | Carotenoid biosynthesis                             | 1                      | ko00906    |
| Metabolism                           | Amino acid metabolism                       | Cysteine and methionine metabolism                  | 1                      | ko00270    |
| Metabolism                           | Carbohydrate metabolism                     | Fructose and mannose metabolism                     | 1                      | ko00051    |
| Metabolism                           | Lipid metabolism                            | Glycerophospholipid metabolism                      | 1                      | ko00564    |
| Metabolism                           | Carbohydrate metabolism                     | Inositol phosphate metabolism                       | 1                      | ko00562    |
| Metabolism                           | Amino acid metabolism                       | Lysine degradation                                  | 1                      | ko00310    |
| Metabolism                           | Energy metabolism                           | Nitrogen metabolism                                 | 1                      | ko00910    |
| Metabolism                           | Energy metabolism                           | Oxidative phosphorylation                           | 1                      | ko00190    |



|                     |                                      |                                                     |   |         |
|---------------------|--------------------------------------|-----------------------------------------------------|---|---------|
| Metabolism          | Carbohydrate metabolism              | Pentose phosphate pathway                           | 1 | ko00030 |
| Environmental       |                                      |                                                     |   |         |
| Information         | Signal transduction                  | Phosphatidylinositol signaling system               | 1 | ko04070 |
| Processing          |                                      |                                                     |   |         |
| Environmental       |                                      |                                                     |   |         |
| Information         | Signal transduction                  | Plant hormone signal transduction                   | 1 | ko04075 |
| Processing          |                                      |                                                     |   |         |
| Metabolism          | Carbohydrate metabolism              | Propanoate metabolism                               | 1 | ko00640 |
| Genetic Information |                                      |                                                     |   |         |
| Processing          | Transcription                        | Spliceosome                                         | 1 | ko03040 |
| Metabolism          | Carbohydrate metabolism              | Starch and sucrose metabolism                       | 1 | ko00500 |
| Metabolism          | Amino acid metabolism                | Tryptophan metabolism                               | 1 | ko00380 |
| Metabolism          | Metabolism of cofactors and vitamins | Ubiquinone and other terpenoid-quinone biosynthesis | 1 | ko00130 |
| Metabolism          | Metabolism of cofactors and vitamins | Vitamin B6 metabolism                               | 1 | ko00750 |

Table S17. RT-qPCR primers used in this study.

| Gene                      | Forward primer       | Reverse primer        |
|---------------------------|----------------------|-----------------------|
| <i>chalcone synthase1</i> | GTGTGGCTAAAGACCTGGCA | ATCGGCTCCAACATATGACGG |
| <i>chalcone synthase2</i> | GTTCTCCGCCTCGCTAAAGA | TCCGCTCCCACAATAAGTGC  |
| <i>chalcone synthase3</i> | CAACAACGCGTCGTCCTTTC | GATTCGTCGCCTGCTTCAAC  |
| <i>chalcone synthase4</i> | CAAGCGGAGAAGGGTTGGAT | TCCGCGGACAGTAACAAGAC  |
| <i>chalcone synthase5</i> | AGGCACATTCTGAGCGAACA | GACTATTGCAGAGGGACGCT  |
| <i>ubiquitin</i>          | CTGGCTCTACCGGAACCAAC | ACGGATGTTCTCCTGTGTGTC |
